# Supplementary material
Source: PubMed Central journal article supplement (PMC8720076)
Supplement: NIHMS1766244-supplement-Supplementary_information.pdf [file NIHMS1766244-supplement-Supplementary_information.pdf]

## Supporting Information

# Ultrasmall Antioxidant Cerium Oxide Nanoparticles For Regulation Of Acute Inflammation

Johoon Kim<sup>1,2</sup>, Gwanui Hong<sup>3</sup>, Luda Mazaleuskaya<sup>3</sup>, Jessica C. Hsu<sup>1,2</sup>, Derick N. Rosario-Berrios<sup>4</sup>, Tilo Grosser<sup>3</sup>, Park F. Cho-Park<sup>3</sup>, David P. Cormode<sup>1,2,4\*</sup>

Department of Radiology<sup>1</sup>, Department of Bioengineering<sup>2</sup>, Institute for Translational Medicine and Therapeutics<sup>3</sup>, Department of Biochemistry and Molecular Biophysics<sup>4</sup>, University of Pennsylvania, 3400 Spruce St, 1 Silverstein, Philadelphia, PA 19104, USA, Tel: 215-615-4656, Fax: 240-368-8096, David.Cormode@pennmedicine.upenn.edu

\* Corresponding Author

**Keywords:** nanoparticle, macrophage, inflammation, cerium oxide, nanozyme

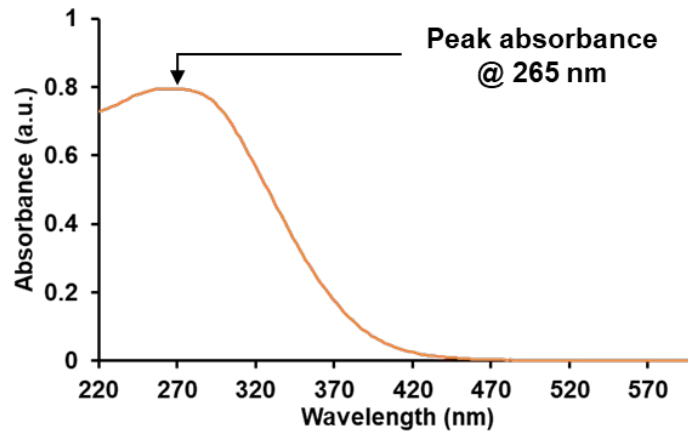

**Figure S1.** UV-vis spectrum of CeONP.

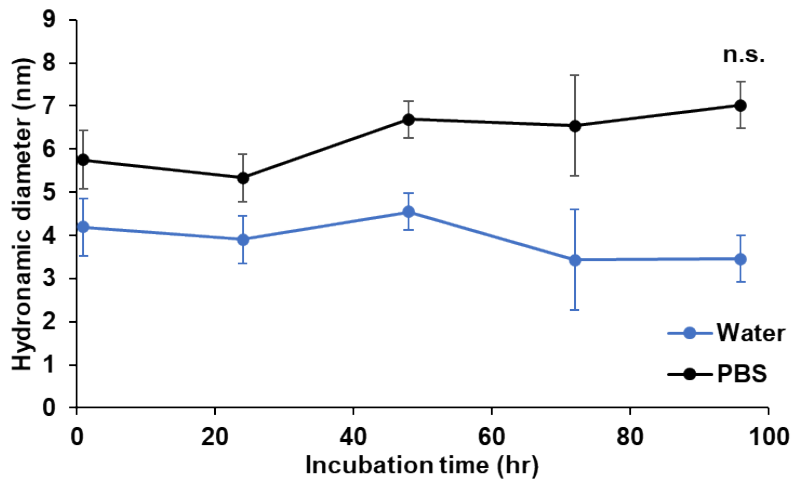

**Figure S2.** Hydrodynamic diameters of CeONP in water and PBS at 24, 48, 72, and 96 h (mean  $\pm$  SD;  $n = 5$ ; n.s. = not significant).

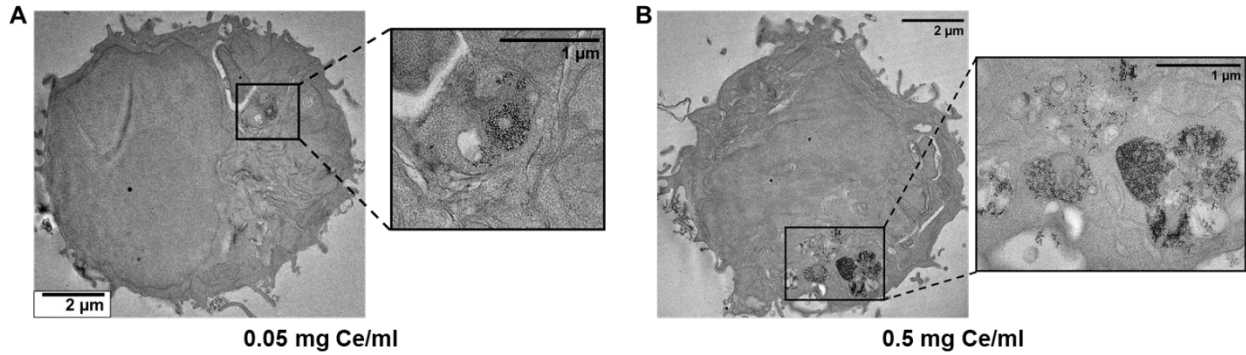

**Figure S3.** TEM of CeONP-treated macrophages at concentrations of 0.05 mg/ml and 0.5 mg/ml.

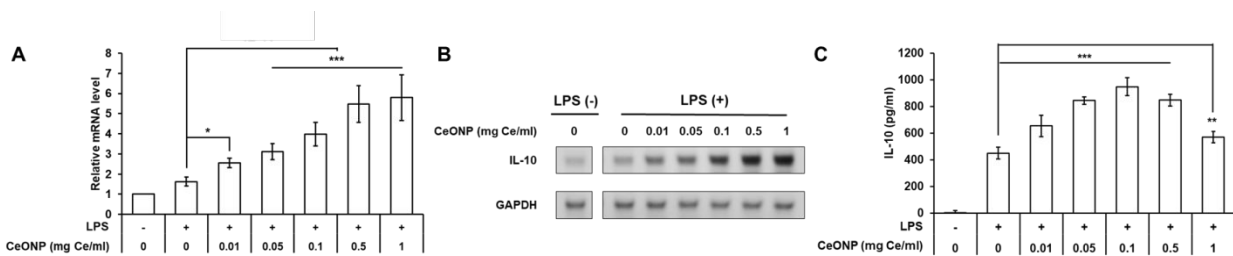

**Figure S4.** A) mRNA expression and B) corresponding mRNA gel electrophoresis image, and C) cytokine secretion level (ELISA) of IL-10 in LPS-stimulated RAW 264.7 cells (mean  $\pm$  SD;  $n = 6$ ; \* $p < 0.05$ , \*\* $p < 0.01$ , and \*\*\* $p < 0.001$ ).

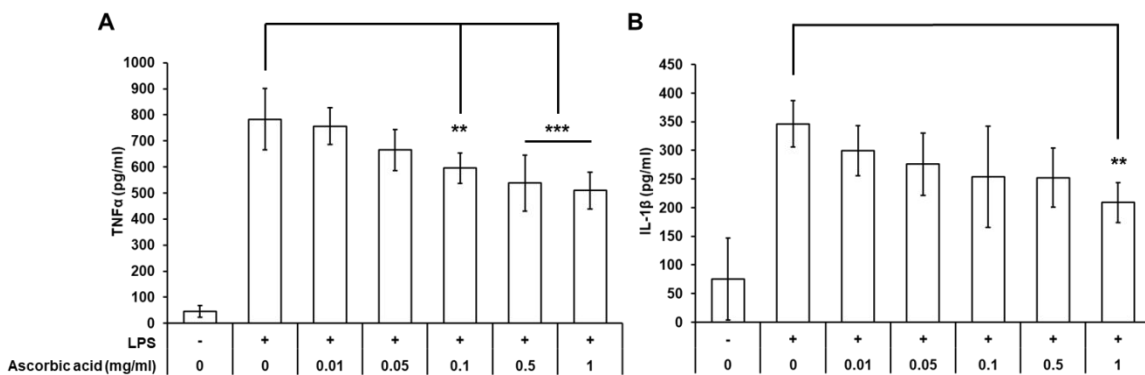

**Figure S5.** *In vitro* anti-inflammatory effect of an antioxidant, ascorbic acid, in LPS-stimulated macrophages shown by change in cytokine secretion of A) TNF $\alpha$  and B) IL-1 $\beta$  (mean  $\pm$  SD;  $n = 8$ ; \* $p < 0.05$ , \*\* $p < 0.01$ , and \*\*\* $p < 0.001$ ).

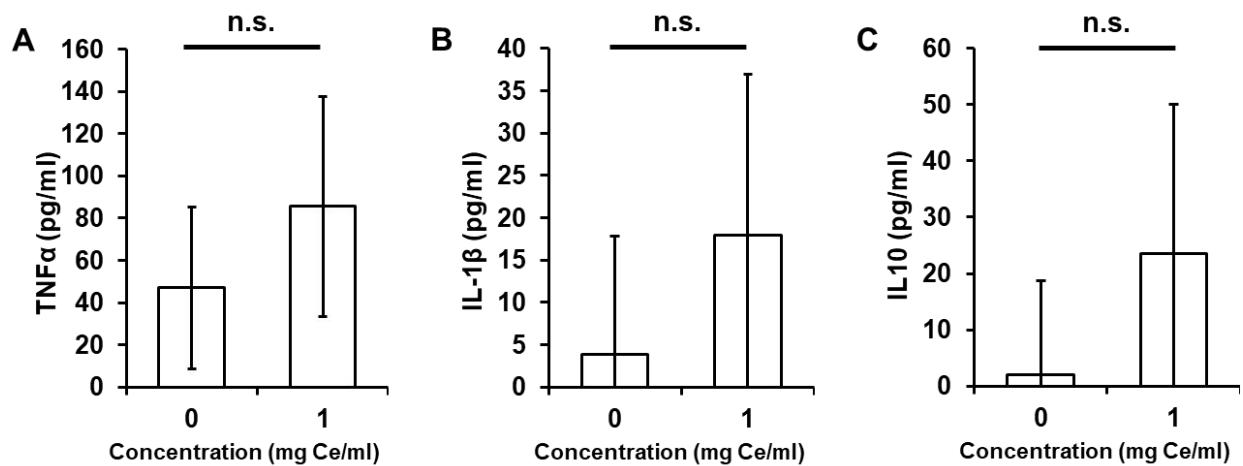

**Figure S6.** Effect of CeONP on cytokine production of macrophage without LPS stimulation (mean  $\pm$  SD;  $n = 8$ ; n.s. = not significant).

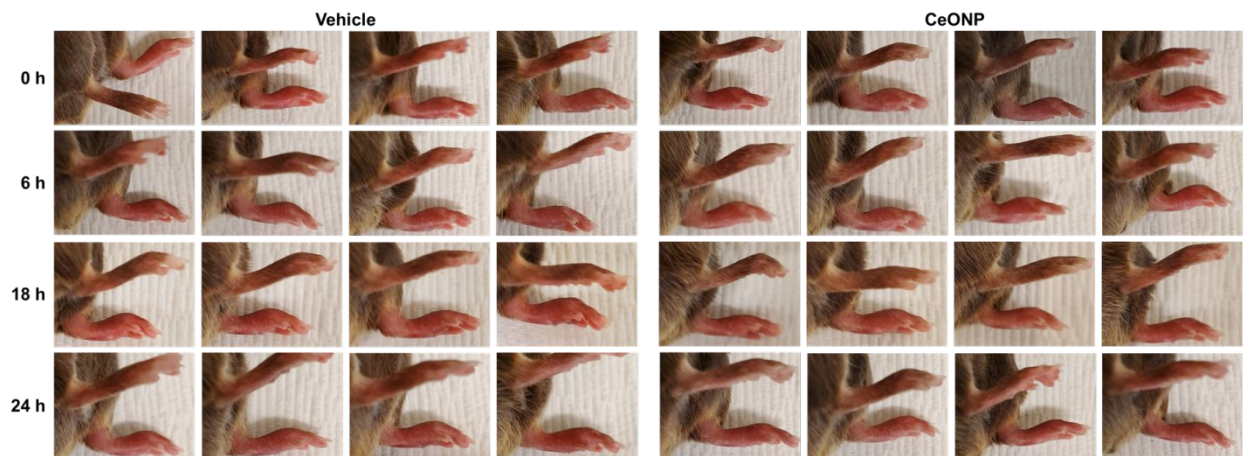

**Figure S7.** Images of inflamed paws of vehicle injected and CeONP treated mice over 24 h period. In each case, the inflamed paw is the left paw (i.e., the paw further from the camera). The right paw is a non-inflamed control.

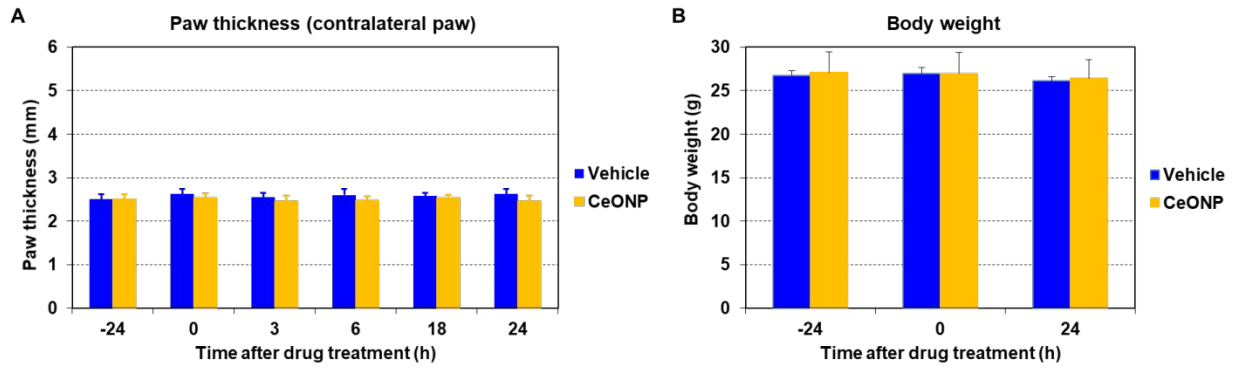

**Figure S8.** A) Paw thickness of contralateral paws (no inflammation induction via CFA injection)  
 B) Body weight of mice during CFA injection and CeONP treatment (mean  $\pm$  SD;  $n = 8$ ).

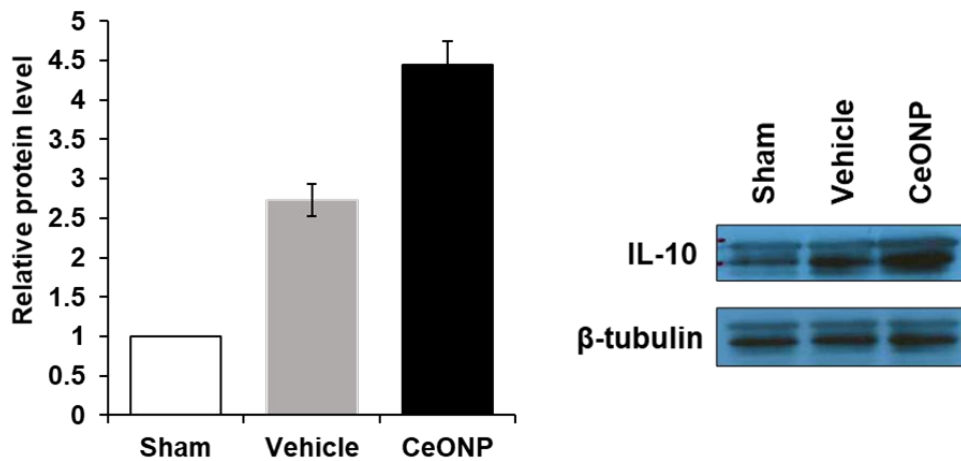

**Figure S9.** Western blot analysis of IL-10 in inflamed paws of each treatment group. No inflammation induction in sham group ( $n = 4$ ). (mean  $\pm$  SD;  $n = 4$ ).

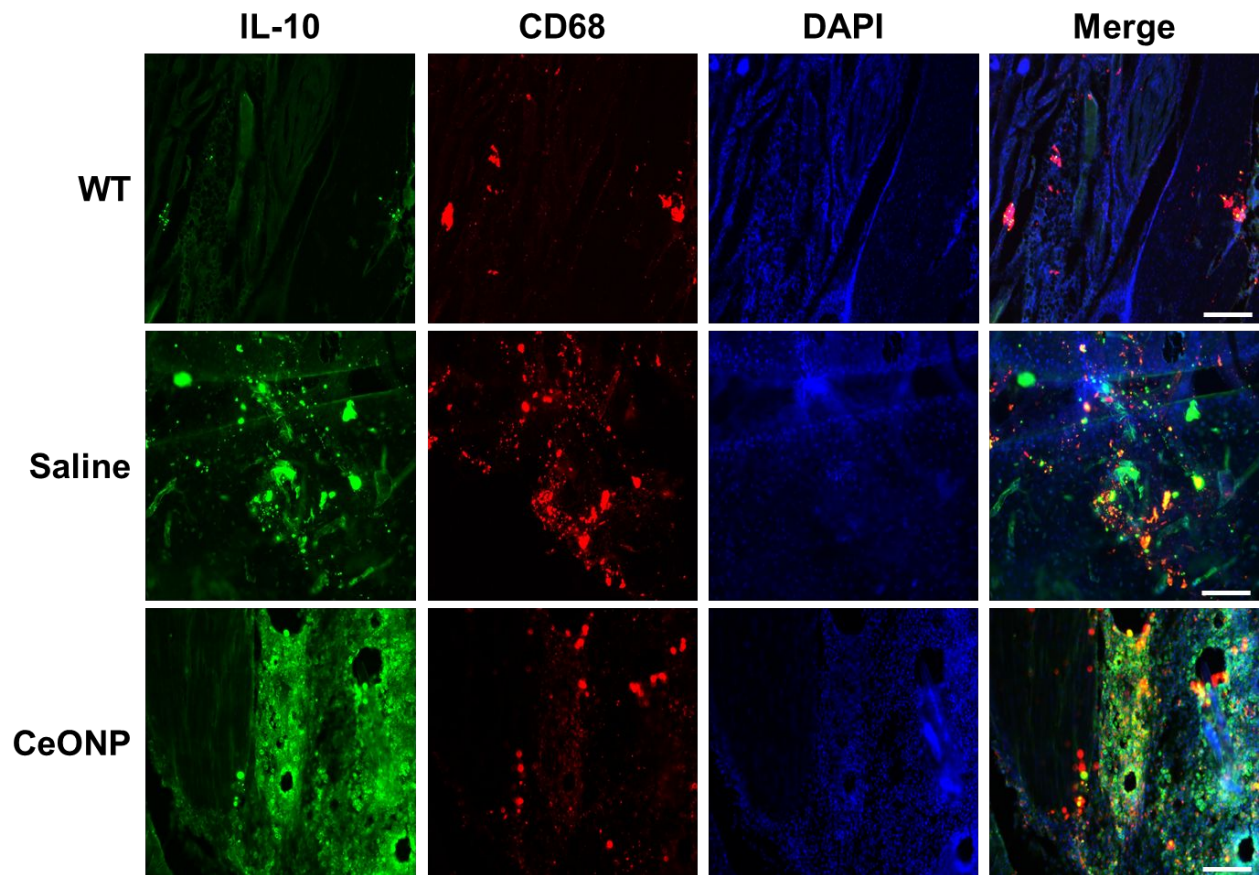

**Figure S10.** Immunofluorescence staining of CD68 and DAPI markers in paw tissues merged with IL-10 marker. Scale bar = 200  $\mu$ m.

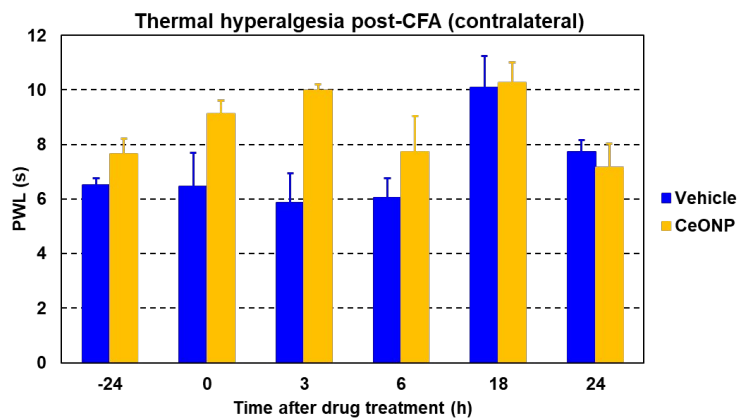

**Figure S11.** PWL in contralateral paws. (mean  $\pm$  SD;  $n = 4$ ).
